# Supplementary material for: Understanding litter decomposition in semiarid ecosystems: linking leaf traits, UV exposure and rainfall variability
Source: PubMed Central journal article supplement (PMC4362295; doi:10.3389/fpls.2015.00140), 2015-03-17
Supplement: presentation_1.pdf [file presentation_1.pdf]

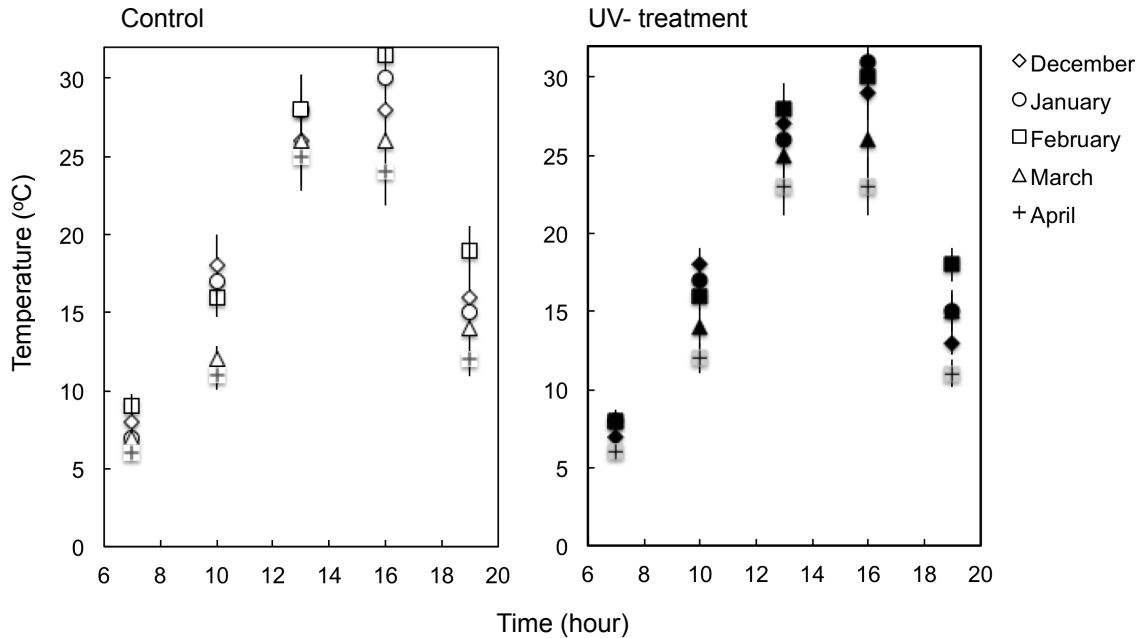

1

2 **Figure S1** Mean temperatures ( $\pm 1$  SEM) inside litterbags exposed to solar radiation

3 during the five-month photodecomposition experiment. Data were recorded on one day

4 per month, at three-hour intervals from 7 am to 7 pm, by placing a probe inside each

5 litterbag. Temperature was measured in 15 randomly chosen bags per treatment. The left

6 panel shows data collected in bags from the control (UV exposed) treatment and the right

7 panel shows data from the UV-filtered treatment. There were marked fluctuations in

8 temperatures during the day ( $F_{1,1} = 10.1, P < 0.01$ ), but there were no significant

9 differences among months ( $F_{1,4} = 0.53, P = 0.99$ ) or UV treatments ( $F_{1,4} = 0.11, P = 0.73$ ).

10 Different symbols represent each month (see labels).

11

12

13

14

15

16
